# Supplementary material for: Interactions among 17 respiratory pathogens: a cross-sectional study using clinical and community surveillance data
Source: PubMed Central journal article supplement — medRxiv. 2022 Feb 6:2022.02.04.22270474. Preprint. [Version 1] doi: 10.1101/2022.02.04.22270474 (PMC8845514; doi:10.1101/2022.02.04.22270474), 2022-02-06

### ***Supplementary Information***

- Table of regression results
- Table of sample sizes by recruitment site
- Supplementary Figures
  - 1. Sensitivity analysis: Results if only single co-infections were included
  - 2. Age and recruitment distributions of coinfections
  - 3. Crt versus number of coinfectors by pathogen
  - 4. *SPn* positivity versus number of viral coinfections in the population over time
  - 5. Sample exclusions flow diagram

**Supplementary Data:** Full regression model results for each interaction summarized in Main Figure 3. Includes results for an unadjusted effect and the full model which adjusts for month, age, and recruitment mode.

<https://docs.google.com/spreadsheets/d/1RfSaEnRhTuwOf5AEPB-blapupCr4DIlpCvvZBvwEskM/edit?usp=sharing>

**Supplementary Table 1:** Number of samples by recruitment site

| Recruitment Type        | Site                                     | Sample Size |
|-------------------------|------------------------------------------|-------------|
| Clinic (Kiosk)          | ChildrensHospitalSeattle                 | 621         |
|                         | ChildrensHospitalSeattleOutpatientClinic | 168         |
|                         | UWHallHealth                             | 43          |
|                         | UWSeaMar                                 | 40          |
|                         | PioneerSquare                            | 27          |
|                         | ChildrensHospitalBellevue                | 25          |
|                         | ChildrensSeaMar                          | 16          |
| Clinic (Flu VE Network) | KaiserPermanente                         | 1931        |
| Community               | SCAN                                     | 5720        |
|                         | swabNSend                                | 1347        |
|                         | WestlakeMall                             | 153         |
|                         | HUB                                      | 100         |
|                         | UWSuzzalloLibrary                        | 83          |
|                         | HarborviewLobby                          | 81          |
|                         | FredHutchLobby                           | 69          |
|                         | SeattleCenter                            | 12          |
|                         | CapitolHillLightRailStation              | 12          |
|                         | Harborview                               | 10          |
|                         | UWGreek                                  | 10          |
|                         | ColumbiaCenter                           | 6           |
|                         | HealthSciencesRotunda                    | 5           |
|                         | Costco                                   | 5           |
|                         | UWClub                                   | 5           |
| KingStreetStation       | 4                                        |             |
| SeaTacInternational     | 3                                        |             |
| UWReopeningSwabNSend    | 3                                        |             |

|                            |                                               |      |
|----------------------------|-----------------------------------------------|------|
|                            | <b>PICAWA</b>                                 | 2    |
|                            | <b>WestCampusChildCareCenter</b>              | 1    |
|                            | <b>SeaTacDomestic</b>                         | 1    |
|                            | <b>UWOdegaardLibrary</b>                      | 1    |
| <b>Hospital (Residual)</b> | <b>RetrospectiveChildren’sHospitalSeattle</b> | 7600 |
|                            | <b>RetrospectiveHarborview</b>                | 2000 |
|                            | <b>RetrospectiveNorthwest</b>                 | 982  |
|                            | <b>RetrospectiveUWMedicalCenter</b>           | 592  |

**Supplementary Figure 1:** Sensitivity analyses - replication of main Figure 3. Keeping only monoinfected and coinfecting samples with only two pathogens. Findings are largely qualitatively similar with some pathogen pairs removed as sample size is reduced.

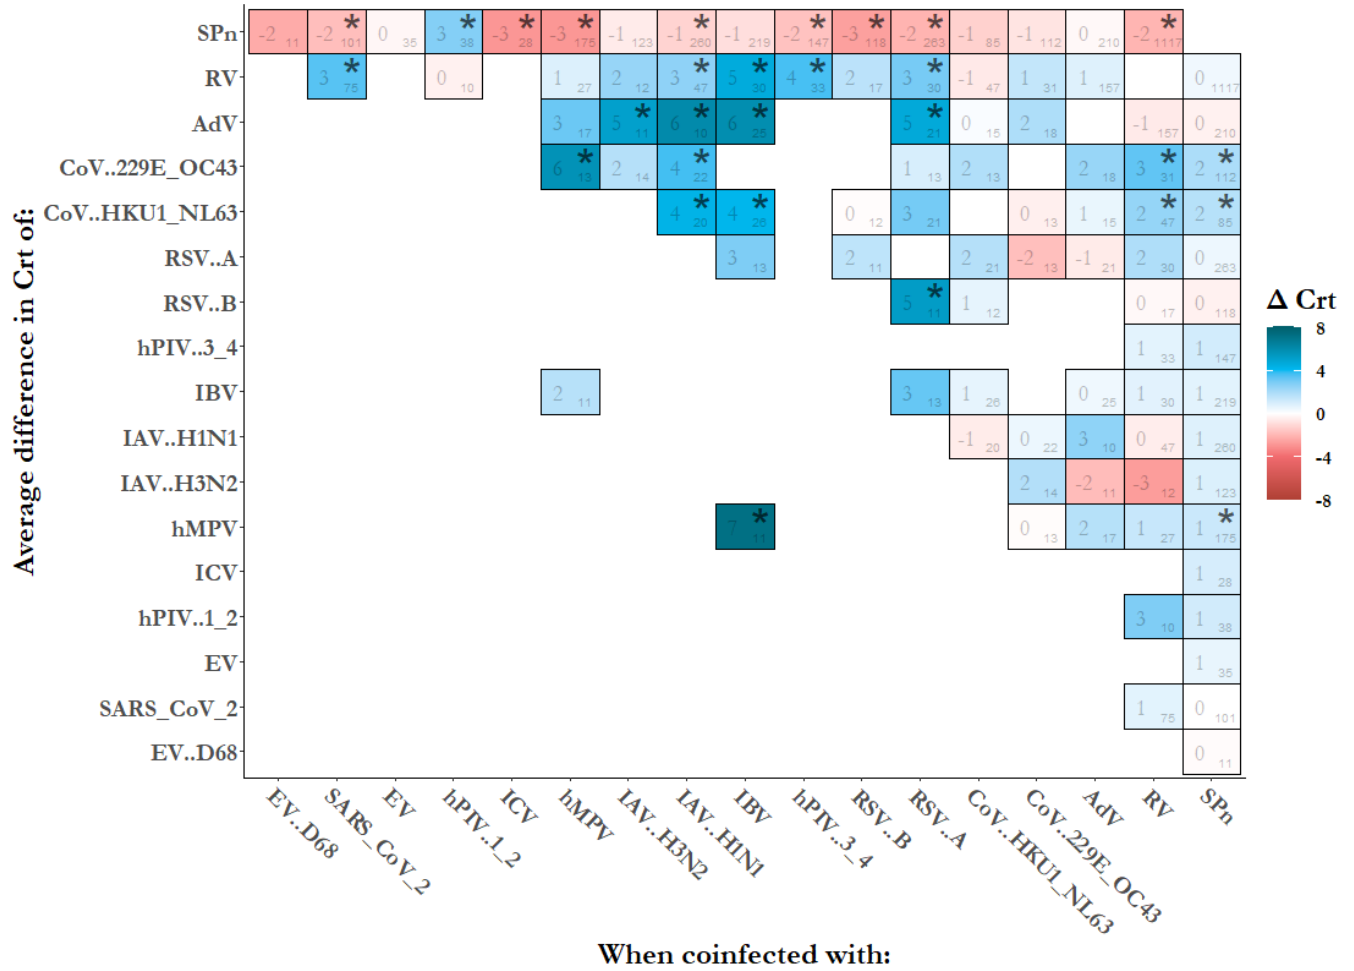

**Supplementary Figure 2:** Frequency of sample infections by age and recruitment type across 83,068 samples with complete metadata. Children and adolescents are more likely than adults to have one or more infections.

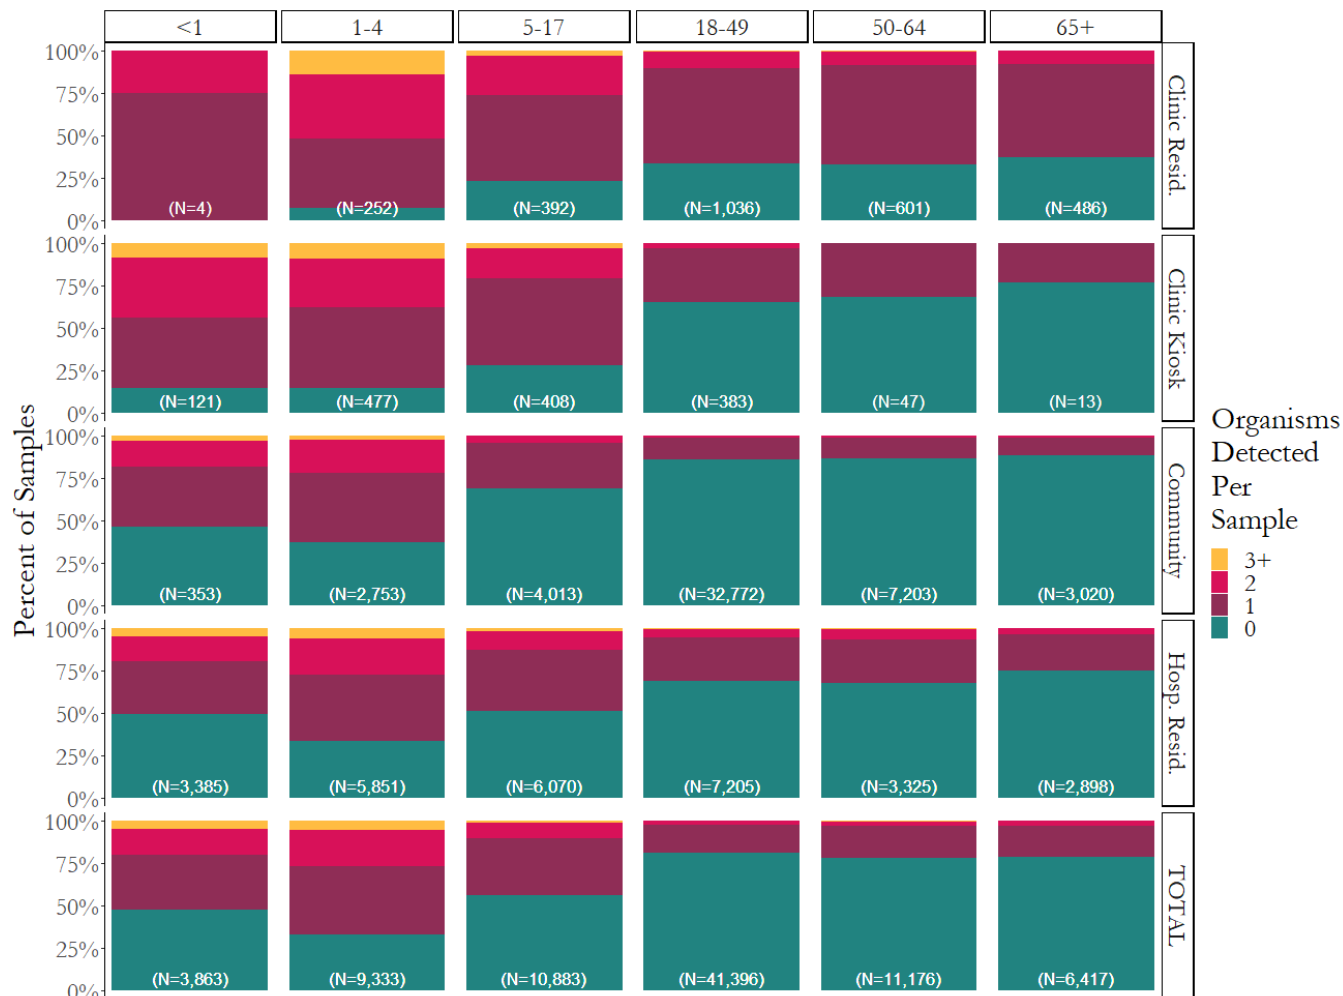

**Supplementary Figure 3:** Average Ct values by number of viral coinfections. Strong gradient observed for SPn, where more viral coinfectors are strongly associated with more bacterial replication in the upper respiratory tract.

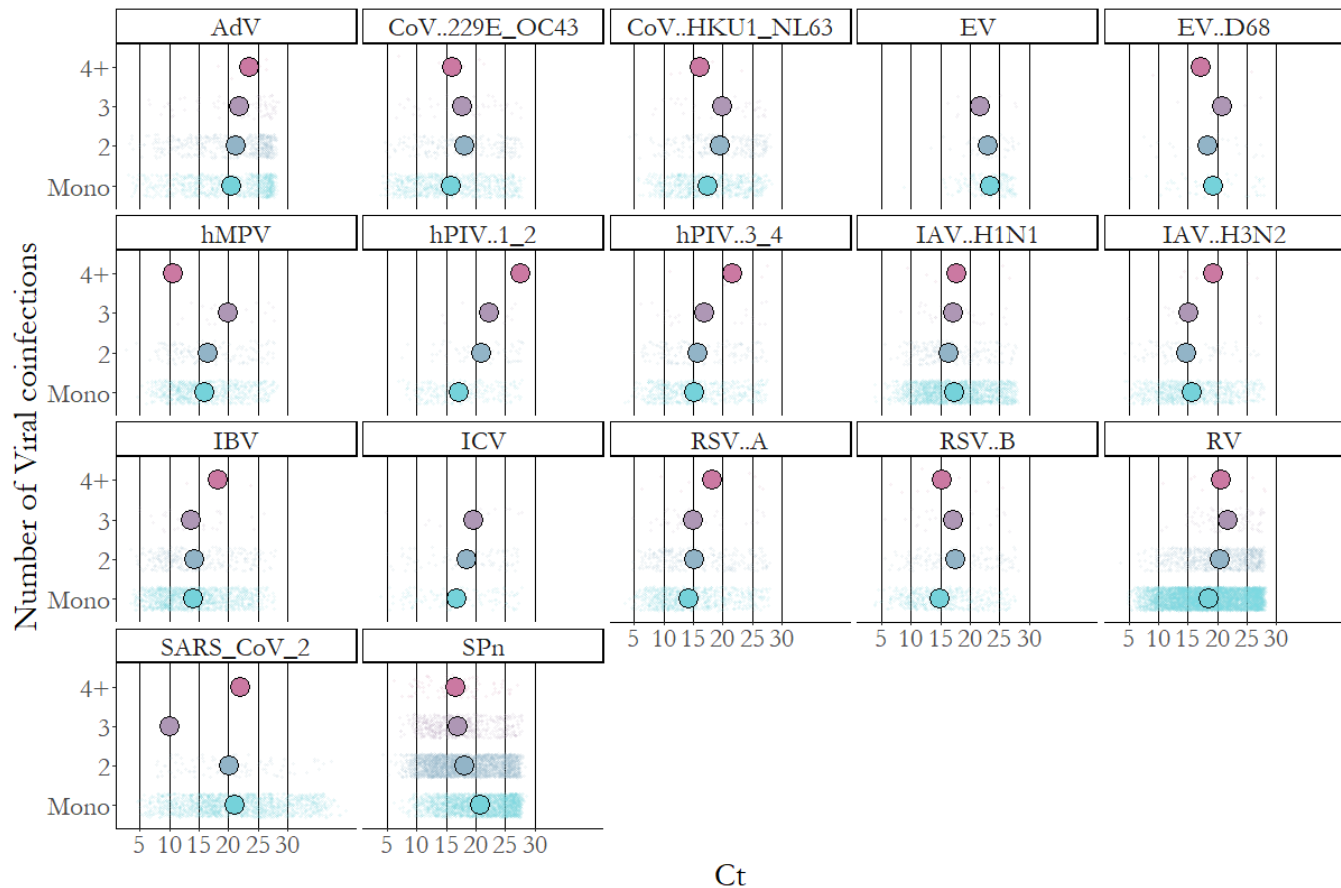

**Supplementary Figure 4:** Ecological association between average number of circulating viruses in a month and the average  $SP_n$  values for  $SP_n$  in community and hospital samples, suggesting population-level evidence for the individual-level interaction explored in this paper.

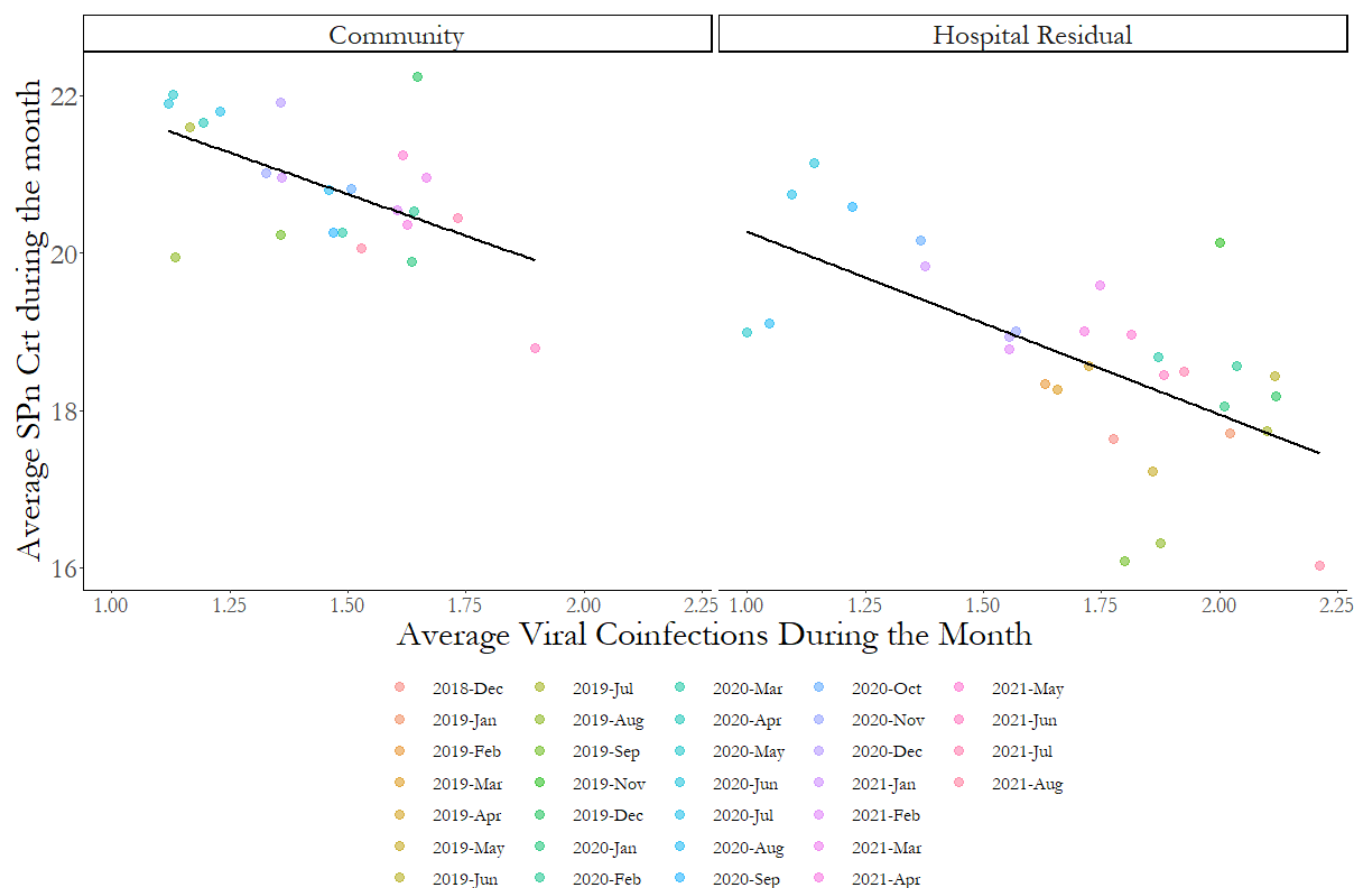

**Supplementary Figure 5: Sample exclusions**

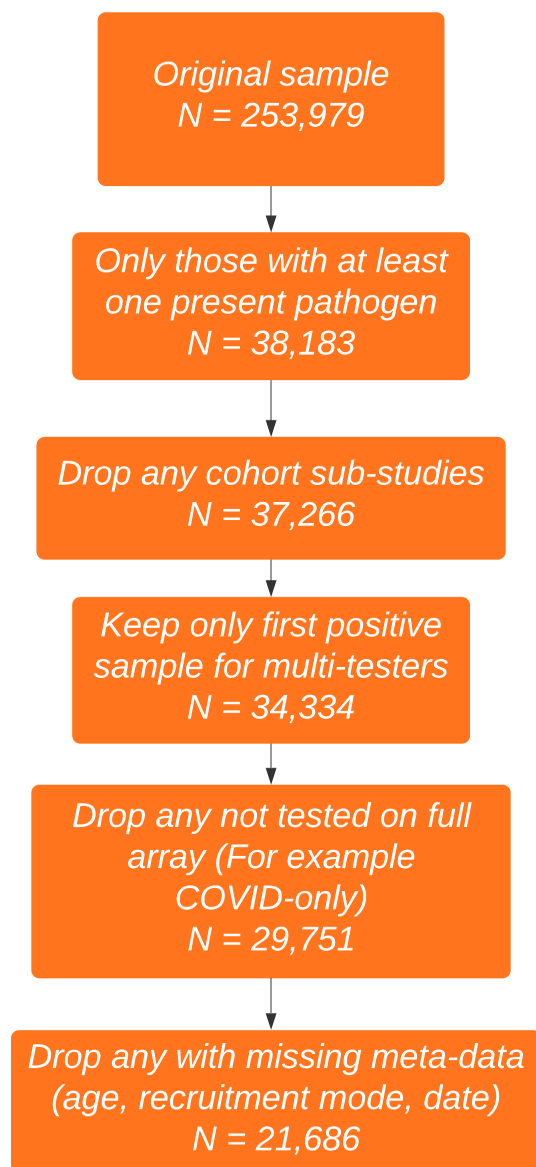

Supplement: NIHPP2022.02.04.22270474V1-supplement-1.pdf [file NIHPP2022.02.04.22270474V1-supplement-1.pdf]
